# Supplementary material
Source: PubMed Central journal article supplement (PMC6517825)
Supplement: EMBJ-38-e100947-s001.pdf [file EMBJ-38-e100947-s001.pdf]

## Table of Contents

|                                                                                                                                                       |     |
|-------------------------------------------------------------------------------------------------------------------------------------------------------|-----|
| Appendix Figure S1. Generation of OTUB1 <sup>fl/fl</sup> mice and phenotypes<br>of OTUB1 <sup>wt/Δ</sup> , and Nestin-Cre OTUB1 <sup>wt/fl</sup> mice | p.2 |
| Appendix Figure S2. OTUB1 directly interacts with and stabilizes SOCS1                                                                                | p.4 |

## Appendix Figure S1

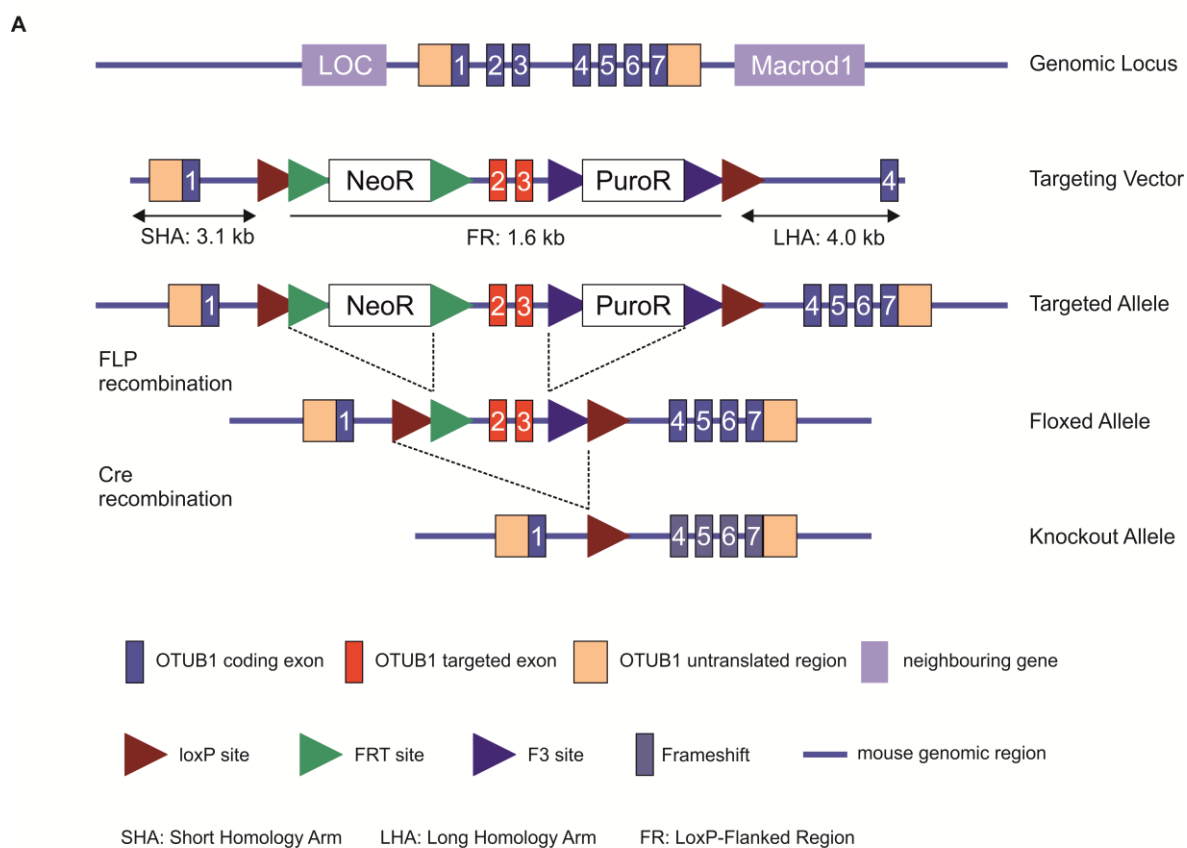

**B** Breeding:  $OTUB1^{wt/\Delta} \times OTUB1^{wt/\Delta}$

| mice       | $OTUB1^{wt/wt}$ | $OTUB1^{wt/\Delta}$ | $OTUB1^{\Delta/\Delta}$ |
|------------|-----------------|---------------------|-------------------------|
| number     | 11              | 18                  | 0                       |
| percentage | 38%             | 60%                 | 0%                      |

**C** Breeding: Nestin-Cre  $OTUB1^{wt/fl}$   $\times$   $OTUB1^{wt/fl}$

| OTUB1           | Cre             | Nestin-Cre <sup>-</sup><br>(number/percentage) | Nestin-Cre <sup>+</sup><br>(number/percentage) |
|-----------------|-----------------|------------------------------------------------|------------------------------------------------|
|                 | $OTUB1^{wt/wt}$ |                                                | 19 (11.9%)                                     |
| $OTUB1^{wt/fl}$ |                 | 42 (26.3%)                                     | 50 (31.3%)                                     |
| $OTUB1^{fl/fl}$ |                 | 25 (15.6%)                                     | 0 (0%)                                         |

Appendix Figure S1. Generation of  $OTUB1^{fl/fl}$  mice and phenotypes of  $OTUB1^{wt/\Delta}$ , and Nestin-Cre  $OTUB1^{wt/fl}$  mice

(A) Schematic representation of the gene targeting strategy for the generation of  $OTUB1^{fl/fl}$  mice. The neomycin and puromycin resistance markers were removed from the conditional

allele by FLP-mediated gene recombination. The resulting OTUB1<sup>fl/fl</sup> mice were further crossed with mice containing different Cre transgenes to generate global/conditional OTUB1 knockout mice.

(B) OTUB1<sup>wt/fl</sup> mice were crossed with Rosa 26-Cre mice to delete exons 2 and 3 of OTUB1, resulting in out-of-frame translation and germline inactivation of OTUB1. Rosa 26-Cre OTUB1<sup>wt/fl</sup> mice were crossed with C57BL/6 mice to remove the Rosa 26-Cre transgene, resulting in the heterogeneous OTUB1<sup>wt/Δ</sup> mice, in which one OTUB1 allele was inactivated. For the generation of OTUB1<sup>Δ/Δ</sup> mice, OTUB1<sup>wt/Δ</sup> mice were crossed with OTUB1<sup>wt/Δ</sup> mice.

(C) Nestin-Cre OTUB1<sup>wt/fl</sup> mice were generated by crossing OTUB1<sup>fl/fl</sup> mice with Nestin-Cre mice.

## Appendix Figure S2

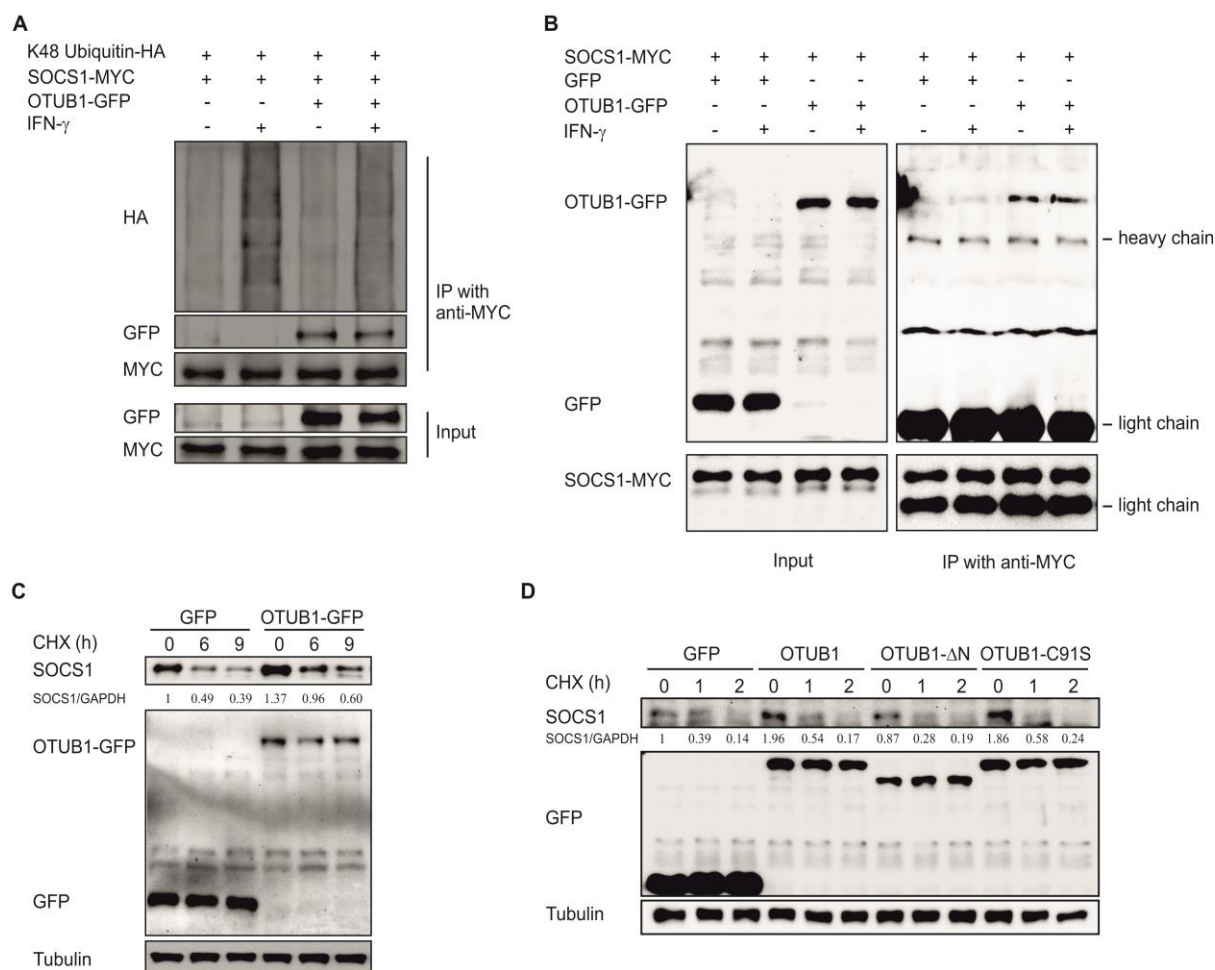

## Appendix Figure S2. OTUB1 directly interacts with and stabilizes SOCS1

(A) Primary astrocytes from GFAP-Cre OTUB1<sup>fl/fl</sup> mice were cotransfected with SOCS1-MYC and K48 ubiquitin-HA plasmids or a combination of SOCS1-MYC, OTUB1-GFP, and K48 ubiquitin-HA plasmids. Twenty-four hours after transfection, cells were left untreated or stimulated with IFN- $\gamma$  (10 ng/ml) for 30 min before lysis. Proteins from whole cell lysates were immunoprecipitated with anti-MYC antibody and analyzed by WB for MYC, GFP, and HA.

(B) Primary astrocytes from GFAP-Cre OTUB1<sup>fl/fl</sup> mice were cotransfected with SOCS1-MYC and GFP plasmids or SOCS1-MYC and OTUB1-GFP plasmids. Twenty-four hours after transfection, cells were left untreated or stimulated with IFN- $\gamma$  (10 ng/ml) for 30 min

before lysis. Proteins from whole cell lysates were immunoprecipitated with anti-MYC antibody and analyzed by WB for MYC and GFP.

(C) Primary astrocytes from GFAP-Cre OTUB1<sup>fl/fl</sup> mice were cotransfected with SOCS1-MYC and GFP plasmids or SOCS1-MYC and OTUB1-GFP plasmids. Twenty-four hours after transfection, cells were treated with CHX (100 µg/ml) for indicated times. SOCS1 protein levels were analyzed by WB.

(D) Primary astrocytes from GFAP-Cre OTUB1<sup>fl/fl</sup> mice were transfected with GFP, OTUB1-GFP, OTUB1-ΔN-GFP, and OTUB1-C91S-GFP plasmids, respectively. Twenty-four hours after transfection, cells were stimulated with IFN-γ (10 ng/ml) for 4 h followed by treatment with CHX (100 µg/ml) for indicated times. SOCS1 protein abundance in the whole cell lysates was analyzed by WB.
