# Supplementary material
Source: PubMed Central journal article supplement (PMC6517825)
Supplement: EMBJ-38-e100947-s002.pdf [file EMBJ-38-e100947-s002.pdf]

## Expanded View Figures

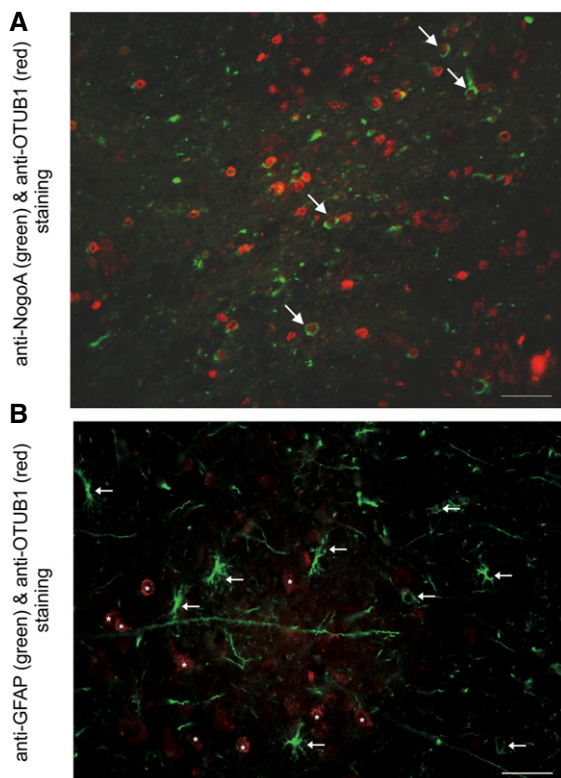

**Figure EV1. Single oligodendrocytes express OTUB1 in MS, while astrocytes do not express OTUB1 in the peritumoral tissue of astrocytoma.**

- A** NogoA<sup>+</sup> oligodendrocytes in a white matter MS lesion (case 5, Table EV1) with inflammatory infiltrates and demyelination express OTUB1 (arrows). This pattern is representative for all 10 patients analyzed. Double immunofluorescence with rabbit anti-OTUB1 (Cy3) and mouse anti-NogoA (Alexa Fluor 488); original magnification  $\times 400$ ; scale bar corresponds to 50  $\mu\text{m}$ .
- B** In the gray matter and the subcortical region adjacent to an astrocytoma (WHO grade II), GFAP<sup>+</sup> astrocytes do not express OTUB1 (arrows). Neurons are OTUB1-positive (asterisks). Data are representative for three cases of peritumoral tissue of astrocytomas (WHO grade II). Double immunofluorescence with mouse anti-GFAP (FITC) and rabbit anti-OTUB1 (Cy3); original magnification  $\times 400$ ; scale bar corresponds to 50  $\mu\text{m}$ .

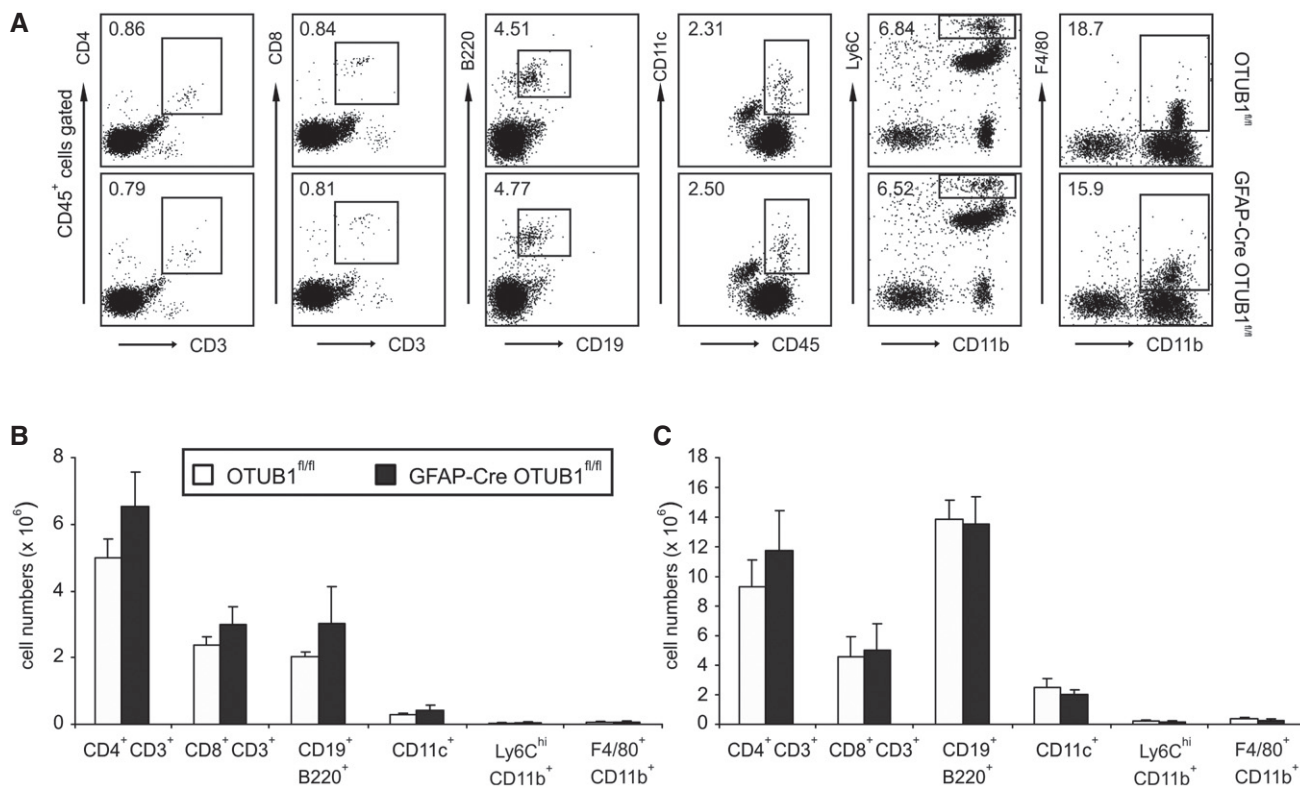

**Figure EV2. Normal composition of leukocytes in GFAP-Cre OTUB1<sup>fl/fl</sup> mice.**

**A** CD45<sup>+</sup> leukocytes were isolated from the spinal cord of GFAP-Cre OTUB1<sup>fl/fl</sup> mice and control mice by Percoll gradients. The percentages of CD4<sup>+</sup> T cells (CD4<sup>+</sup> CD3<sup>+</sup>), CD8<sup>+</sup> T cells (CD8<sup>+</sup> CD3<sup>+</sup>), B cells (CD19<sup>+</sup> B220<sup>+</sup>), dendritic cells (CD11c<sup>+</sup>), inflammatory monocytes (Ly6C<sup>hi</sup> CD11b<sup>+</sup>), and macrophages (F4/80<sup>+</sup> CD11b<sup>+</sup>) were analyzed by flow cytometry. Representative dot plots are shown.

**B, C** CD45<sup>+</sup> leukocytes were isolated from the lymph node (**B**) and spleen (**C**) of GFAP-Cre OTUB1<sup>fl/fl</sup> mice ( $n = 4$ ) and control mice ( $n = 4$ ). Cells were counted with the hemocytometer and analyzed by flow cytometry. Data show the absolute number of indicated cell populations (mean + SEM).

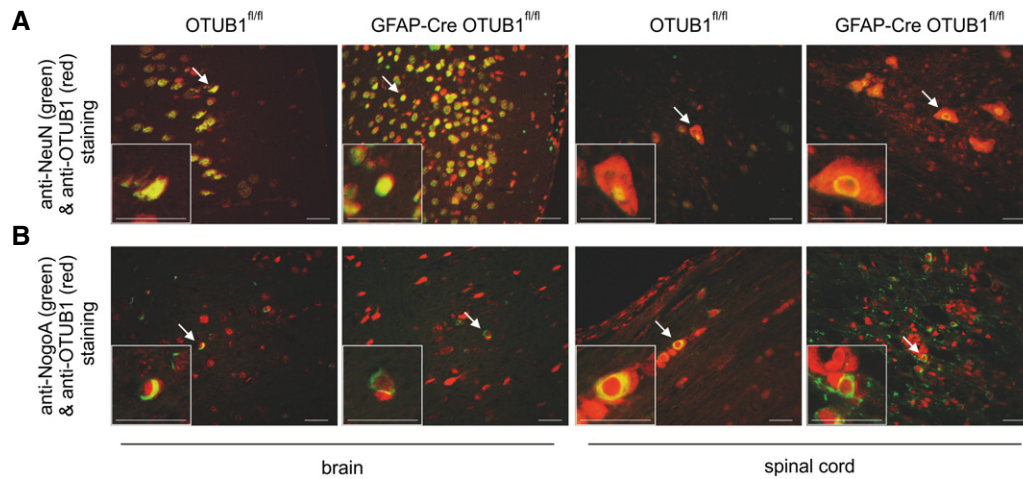

**Figure EV3.** OTUB1 expression in the brain and spinal cord of OTUB1<sup>fl/fl</sup> and GFAP-Cre OTUB1<sup>fl/fl</sup> mice at day 22 p.i.

- A NeuN<sup>+</sup> neurons of an OTUB1<sup>fl/fl</sup> and a GFAP-Cre OTUB1<sup>fl/fl</sup> mouse equally express OTUB1 (arrows) in the brain and spinal cord. Double immunofluorescence with rabbit anti-OTUB1 (Cy3) and mouse anti-NeuN (FITC).
- B Some NogoA<sup>+</sup> oligodendrocytes (arrows) in the brain and spinal cord express OTUB1 in an OTUB1<sup>fl/fl</sup> and a GFAP-Cre OTUB1<sup>fl/fl</sup> mouse. Double immunofluorescence with rabbit anti-OTUB1 (Cy3) and mouse anti-NogoA (Alexa Fluor 488).

Data information: All photographs are representative of three mice per group; original magnification  $\times 400$ ; the inserts show higher magnification of cells marked by an arrow ( $\times 1,200$ ). Scale bars correspond to 50  $\mu\text{m}$ .

**Figure EV4.** GFAP-Cre OTUB1<sup>fl/fl</sup> but not Synapsin-Cre OTUB1<sup>fl/fl</sup> mice develop more severe EAE.

- A EAE was induced in Synapsin-Cre OTUB1<sup>fl/fl</sup> mice ( $n = 5$ ) and OTUB1<sup>fl/fl</sup> control littermates ( $n = 5$ ) by MOG<sub>35-55</sub> peptide immunization with pertussis toxin. Graph shows the mean clinical scores  $\pm$  SEM.
- B, C Leukocytes were isolated from the lymph node (B) and spleen (C) of OTUB1<sup>fl/fl</sup> ( $n = 7$ ) and GFAP-Cre OTUB1<sup>fl/fl</sup> ( $n = 7$ ) mice at day 15 p.i. Cells were counted with the hemocytometer and analyzed with flow cytometry. Data show the absolute number of indicated cell populations (mean  $\pm$  SEM).
- D, E Absolute numbers of GM-CSF-, IFN- $\gamma$ -, and IL-17-producing CD4<sup>+</sup> T cells in the lymph node (D) and spleen (E) of OTUB1<sup>fl/fl</sup> ( $n = 7$ ) and GFAP-Cre OTUB1<sup>fl/fl</sup> ( $n = 7$ ) mice were calculated based on flow cytometry results. Data show the mean  $\pm$  SEM at day 15 p.i.
- F Body weight of OTUB1<sup>fl/fl</sup> ( $n = 7$ ) and GFAP-Cre OTUB1<sup>fl/fl</sup> ( $n = 7$ ) mice was monitored daily after EAE induction. Data show the relative change in body weight normalized to that on day 0 (mean  $\pm$  SEM). Two-tailed Student's *t*-test was used,  $*P < 0.05$ .
- G Astrocytes were selectively isolated by MACS from unimmunized and diseased (day 15 p.i.) OTUB1<sup>fl/fl</sup> and GFAP-Cre OTUB1<sup>fl/fl</sup> mice, respectively. Relative expression of IL-6 and CXCL1 mRNA was determined by quantitative real-time PCR. Data are presented as relative increase in genes at day 15 p.i. over gene expression of astrocytes from unimmunized control mice ( $n = 3$  for all groups; mean  $\pm$  SEM).
- H Primary astrocytes isolated from OTUB1<sup>fl/fl</sup> ( $n = 3$ ) and GFAP-Cre OTUB1<sup>fl/fl</sup> ( $n = 3$ ) mice were left untreated or stimulated with IFN- $\gamma$  (10 ng/ml), IL-17 (50 ng/ml), and TNF (10 ng/ml), respectively, for 16 h. mRNA levels of IL-6 and CXCL1 were detected by quantitative real-time PCR. Data are shown as relative increase over untreated controls (mean  $\pm$  SEM).

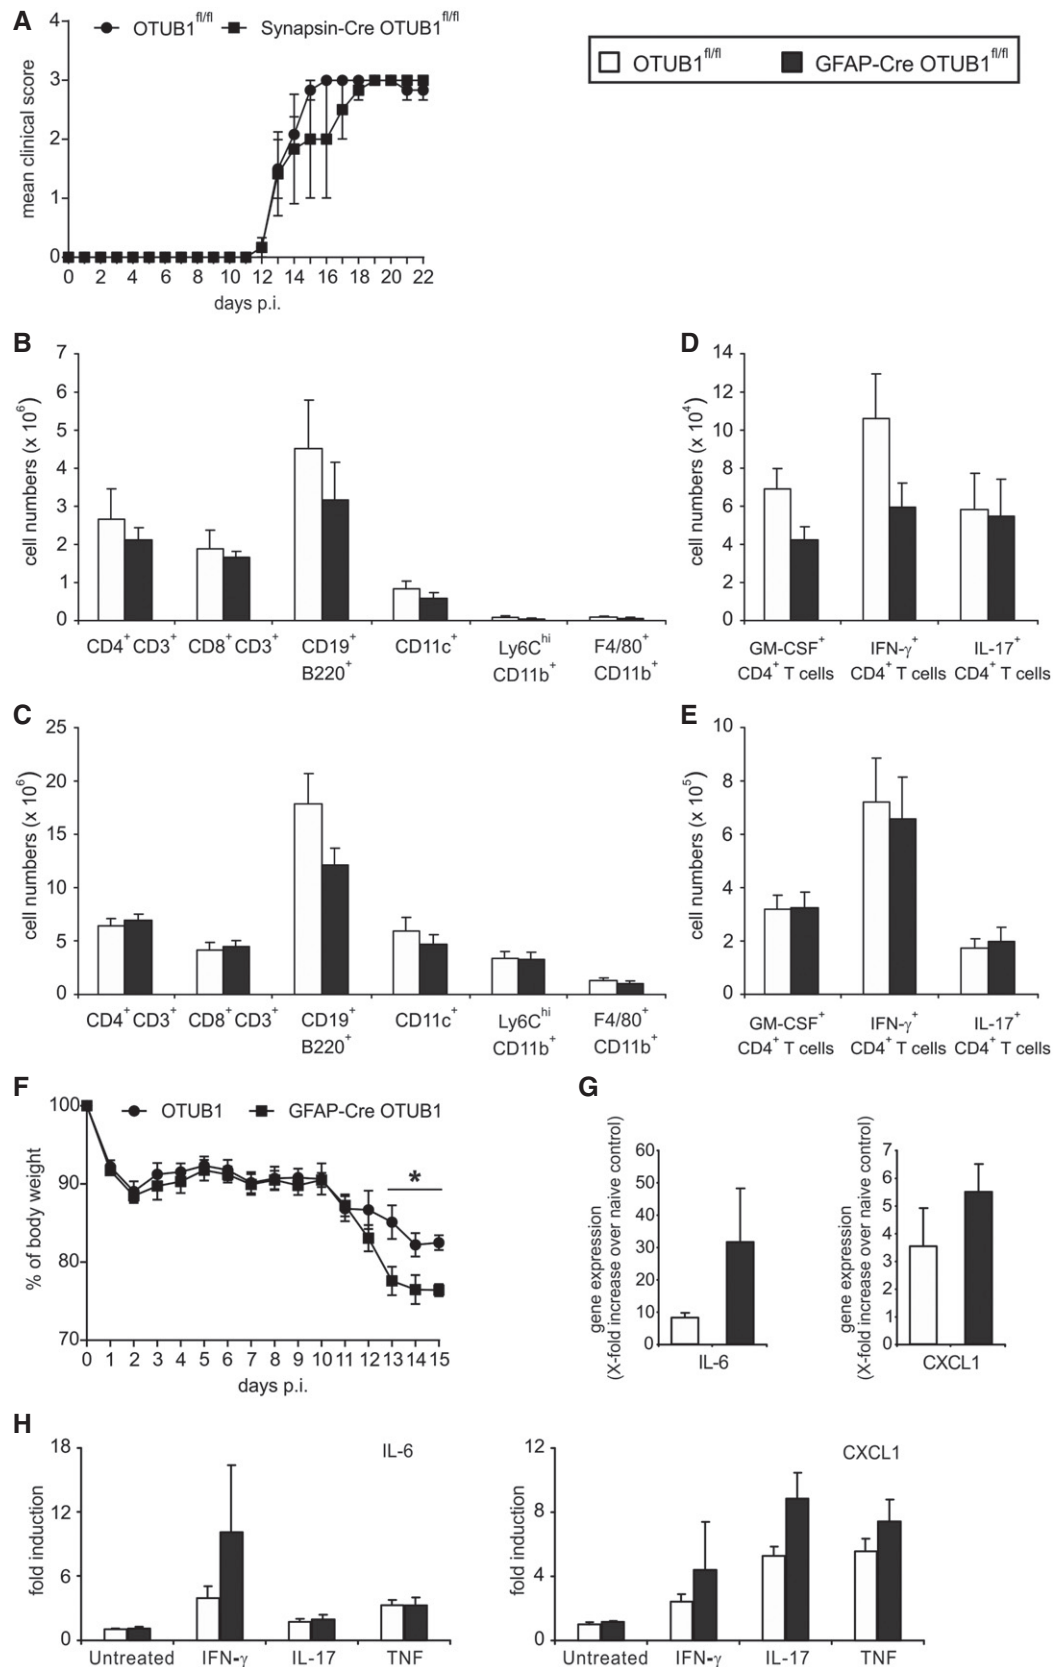

Figure EV4.

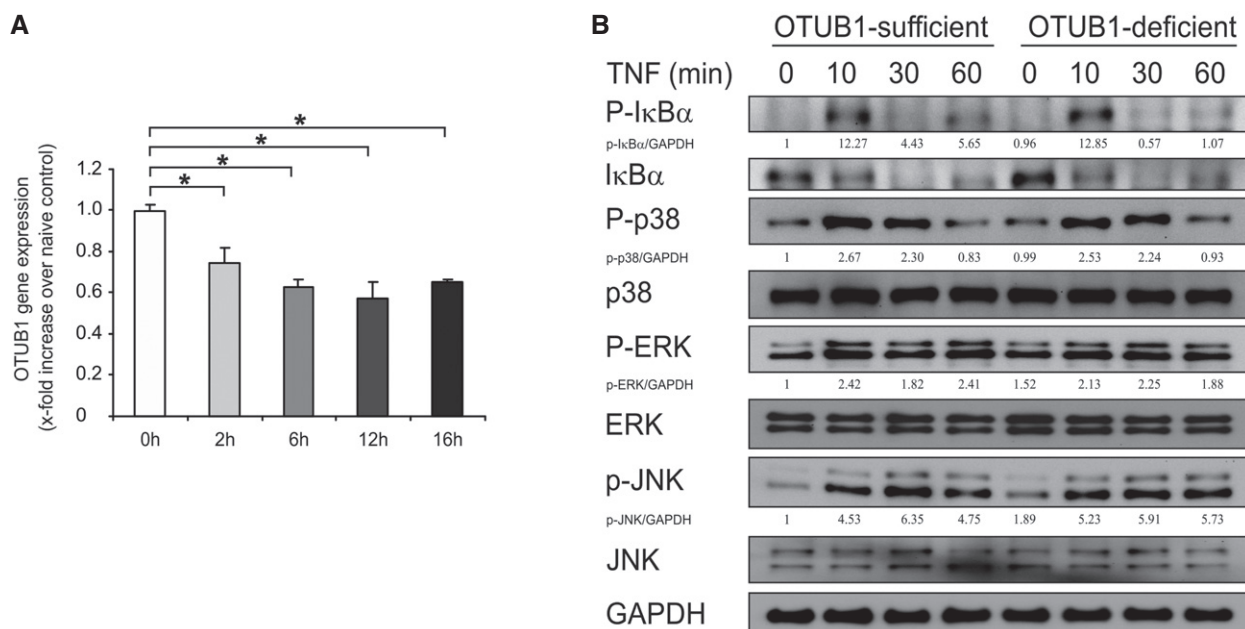

**Figure EV5. OTUB1 mRNA levels are downregulated by IFN- $\gamma$  treatment, and OTUB1 does not interfere with TNF-induced signaling pathways.**

A Primary astrocytes from wild-type C57BL/6 mice were stimulated with IFN- $\gamma$  (10 ng/ml) for indicated times. Thereafter, mRNA was isolated and analyzed by quantitative real-time PCR. Data show the relative expression of OTUB1 mRNA compared to untreated controls ( $n = 3$  for all groups). Data represent mean + SEM. Two-tailed Student's  $t$ -test was used,  $*P < 0.05$ .

B Primary astrocytes from OTUB1<sup>fl/fl</sup> and GFAP-Cre OTUB1<sup>fl/fl</sup> mice were stimulated with TNF (10 ng/ml) for indicated times. Whole cell lysates were analyzed by WB with indicated antibodies.

Source data are available online for this figure.
