# Supplementary material
Source: PubMed Central journal article supplement (PMC6517825)

Figure 2

A

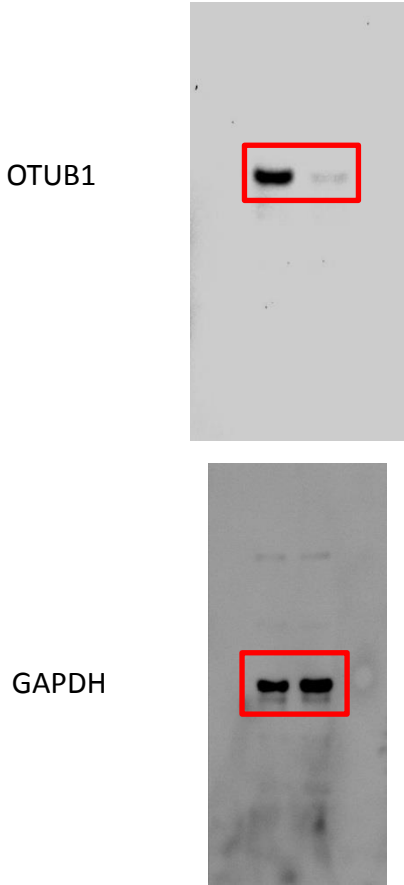

B

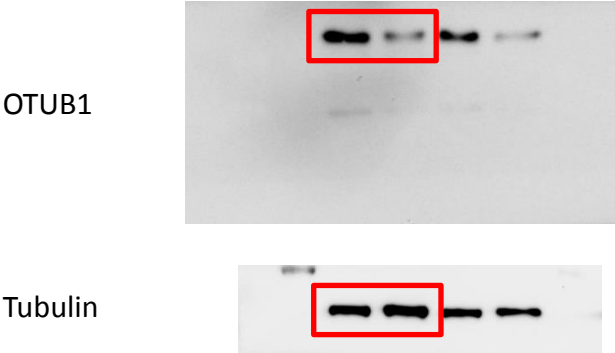

Supplement: EMBJ-38-e100947-s004.pdf [file EMBJ-38-e100947-s004.pdf]

Figure 5

A

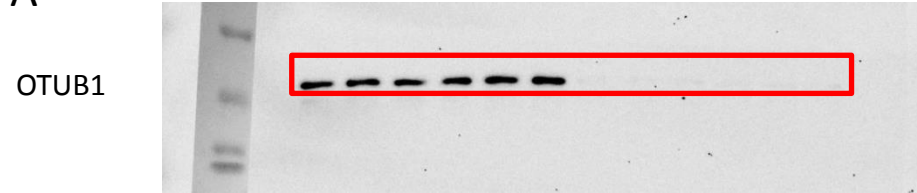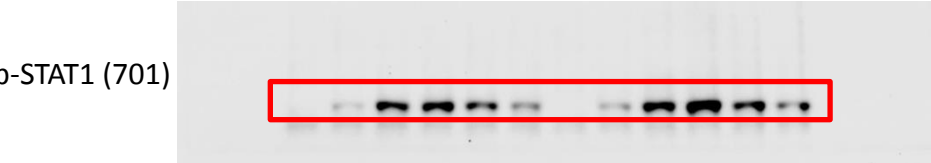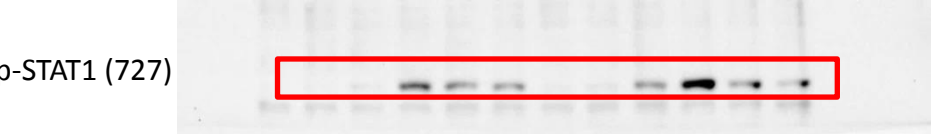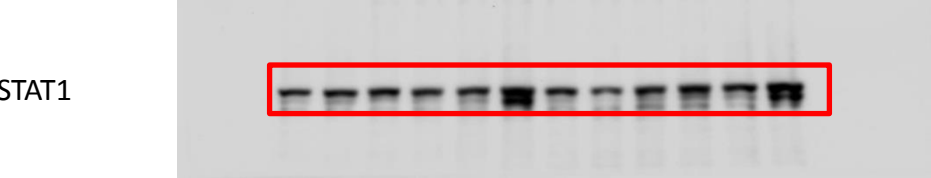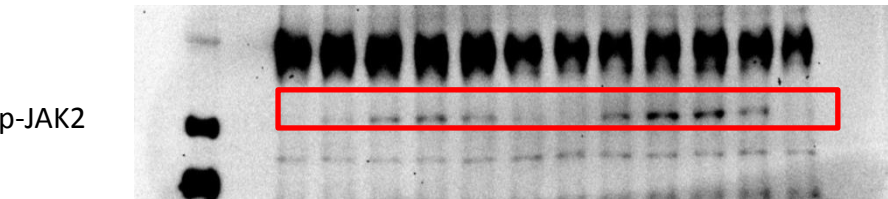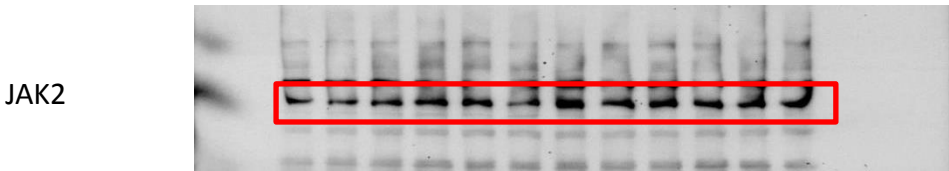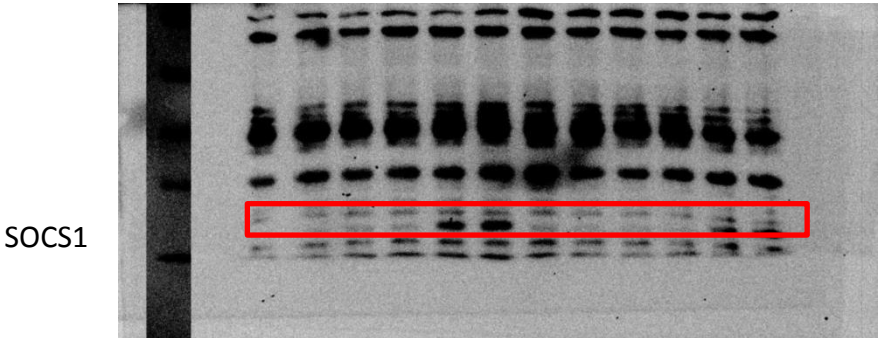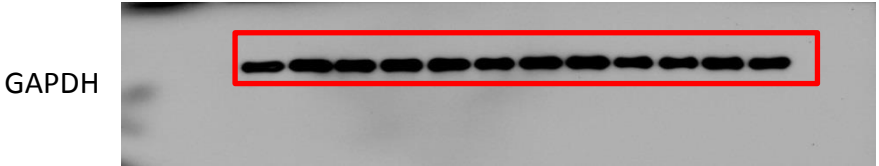

B

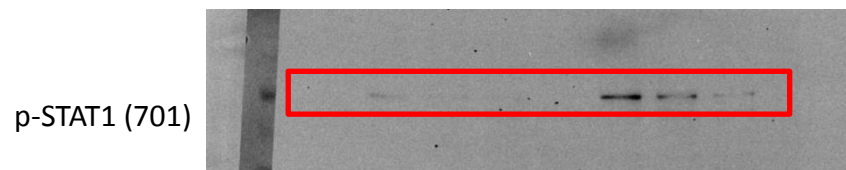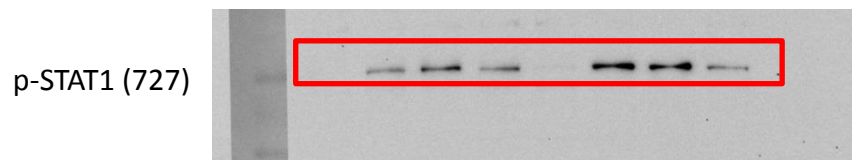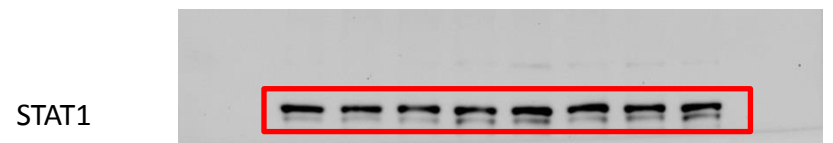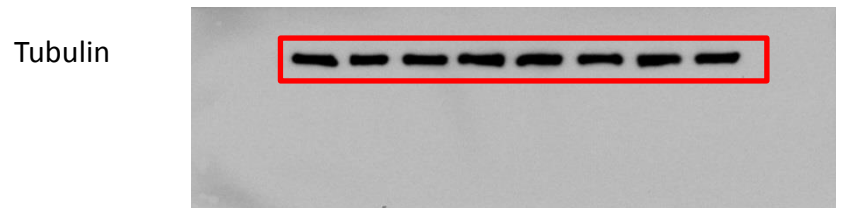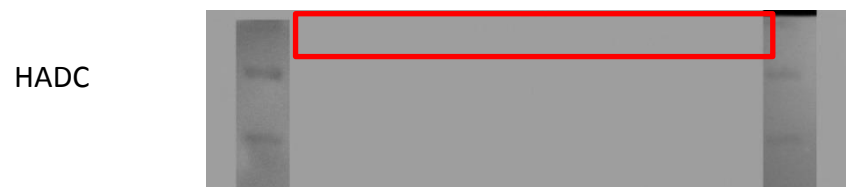

cytoplasm

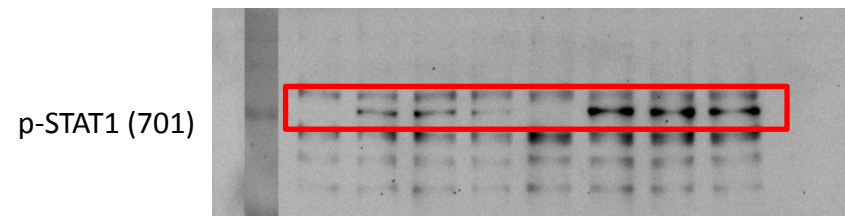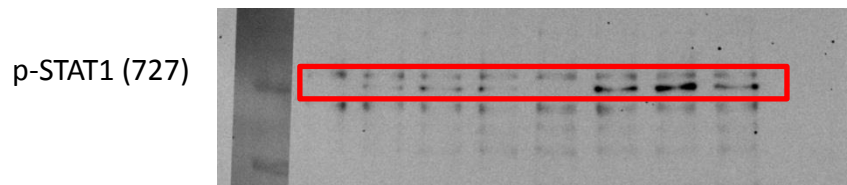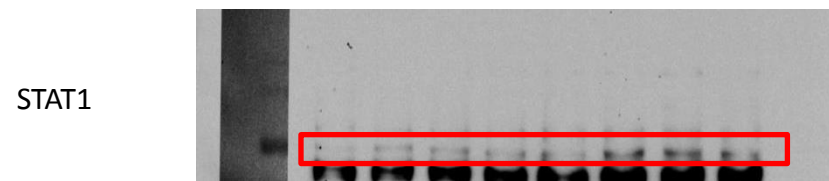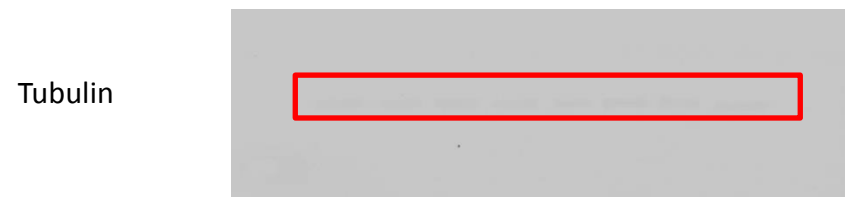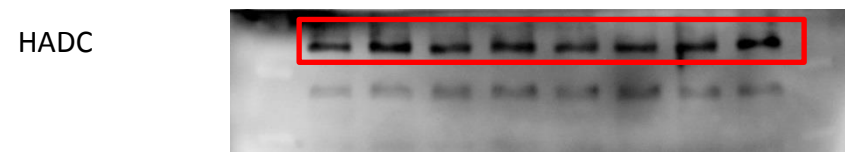

Nucleus

E

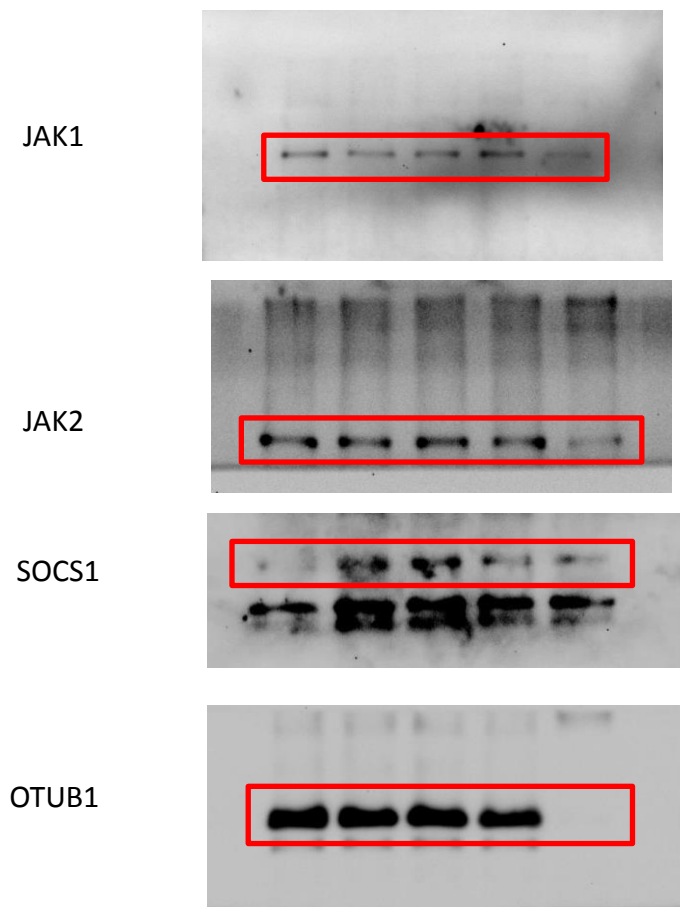

IP

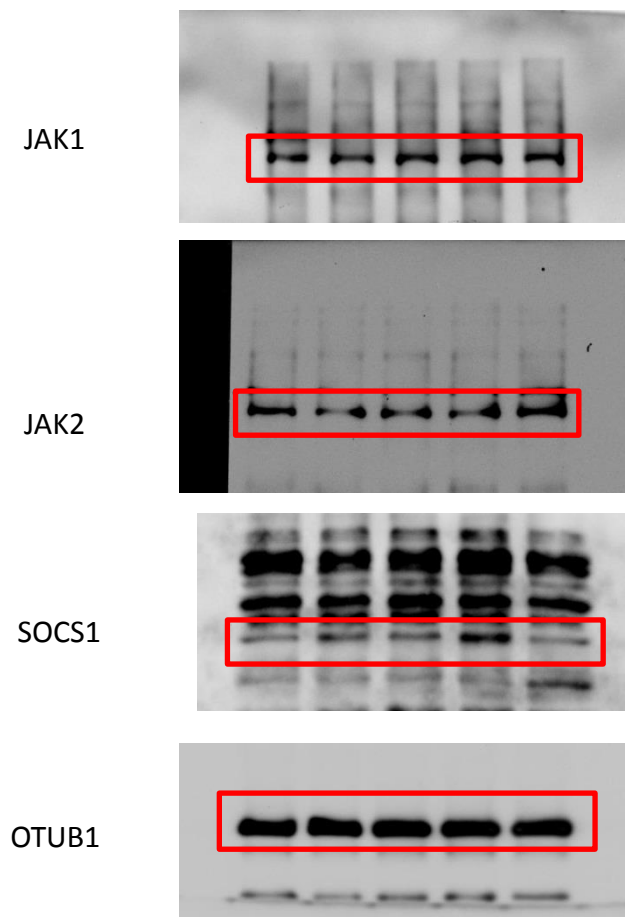

Input

F

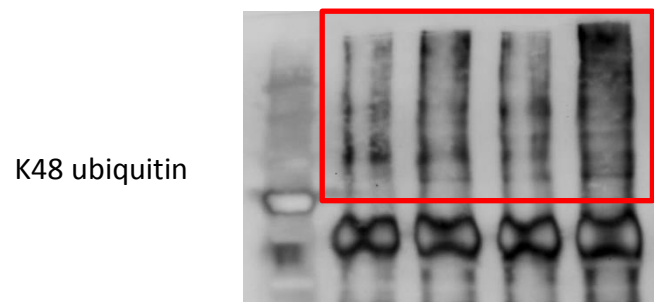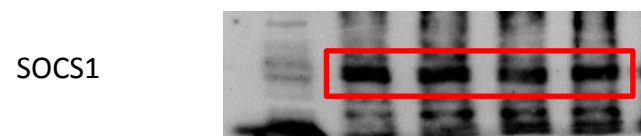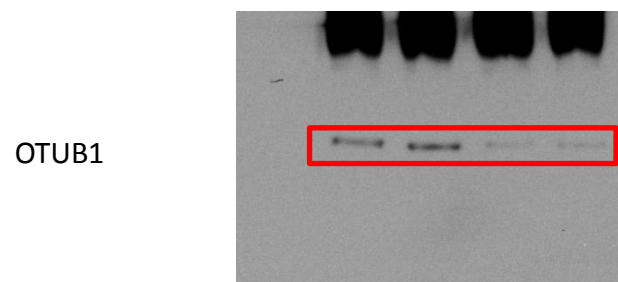

IP

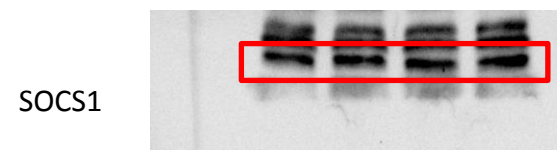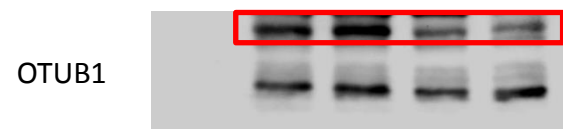

Input

G

HA

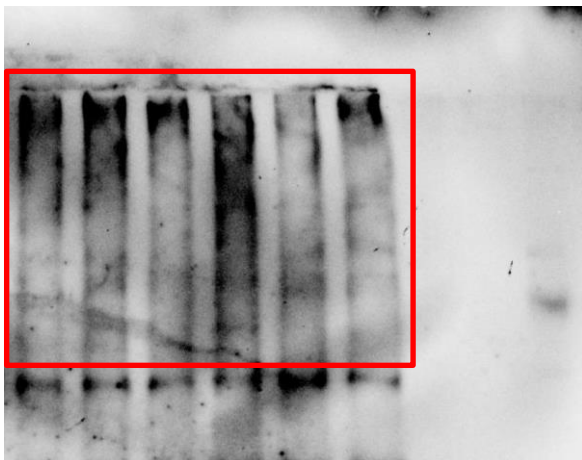

GFP

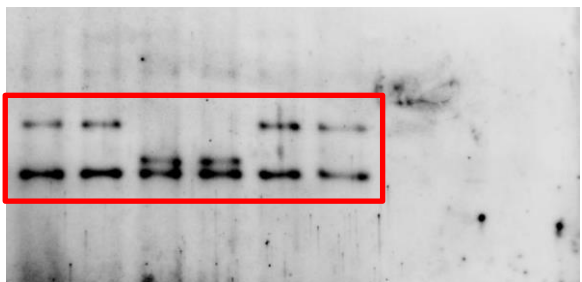

MYC

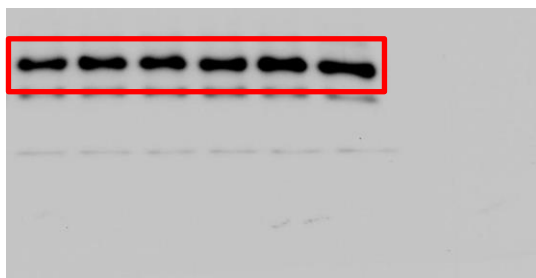

IP

GFP

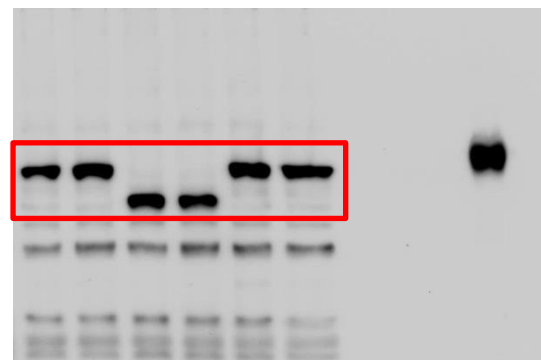

MYC

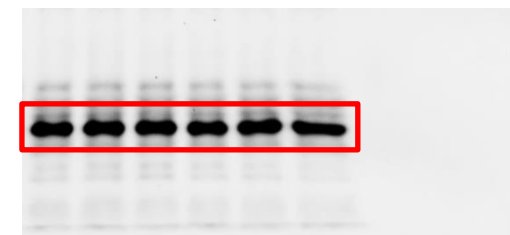

Input

Supplement: EMBJ-38-e100947-s005.pdf [file EMBJ-38-e100947-s005.pdf]

Figure 6

A

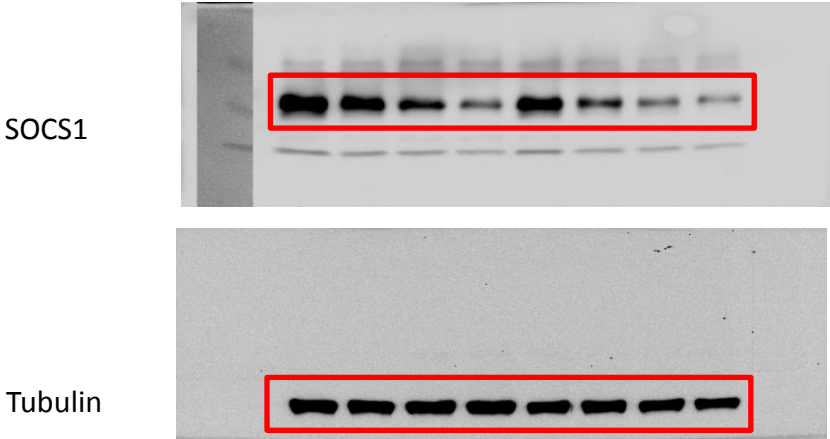

B

SOCS1

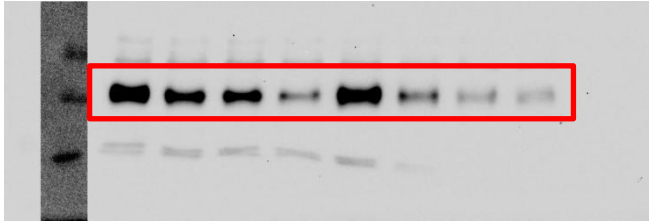

Tubulin

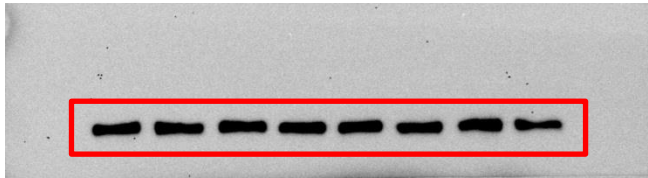

C

SOCS1

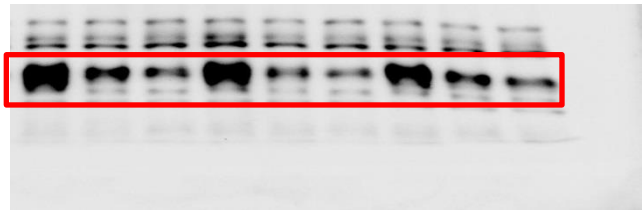

GFP

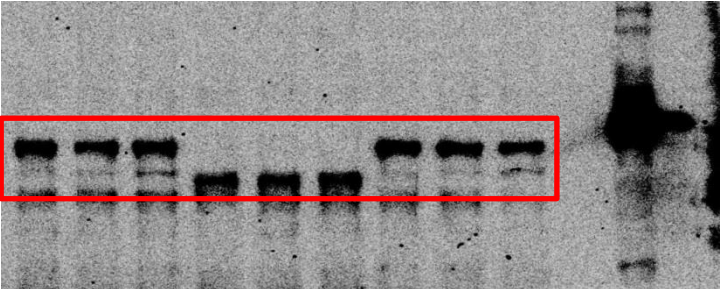

Tubulin

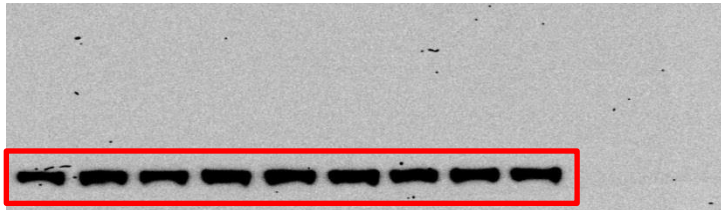

D

SOCS1

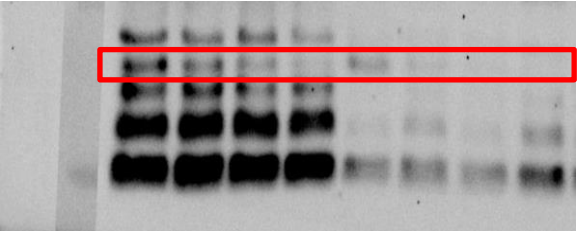

OTUB1

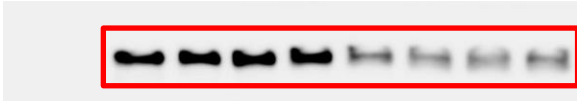

Tubulin

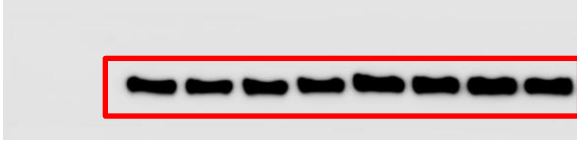

E

SOCS1

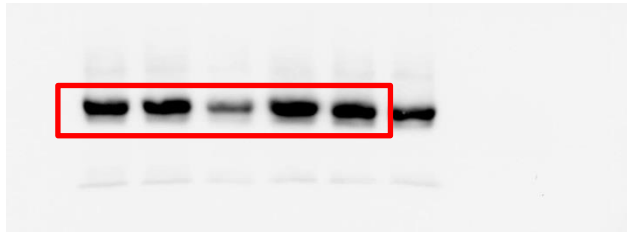

Tubulin

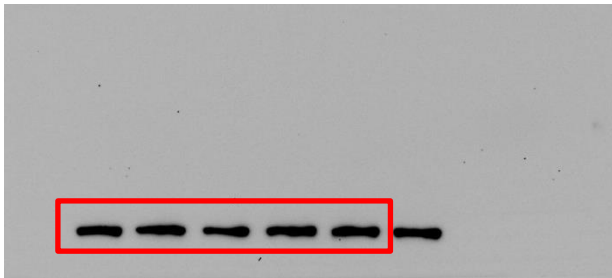

Supplement: EMBJ-38-e100947-s006.pdf [file EMBJ-38-e100947-s006.pdf]

Figure 7

A

P-STAT1 (701)

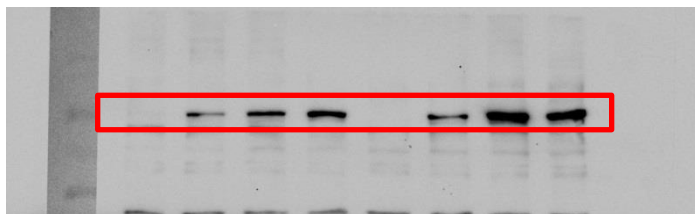

P-STAT1 (727)

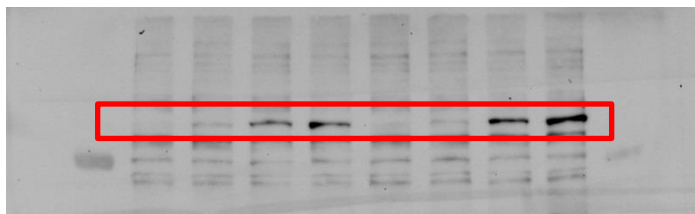

STAT1

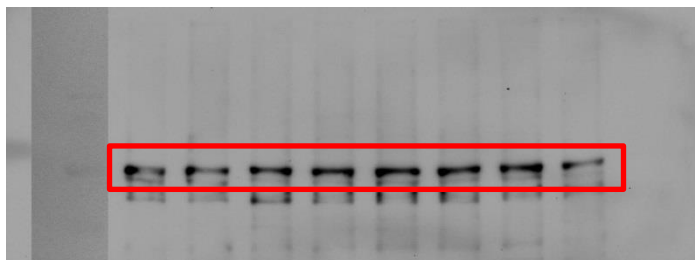

GAPDH

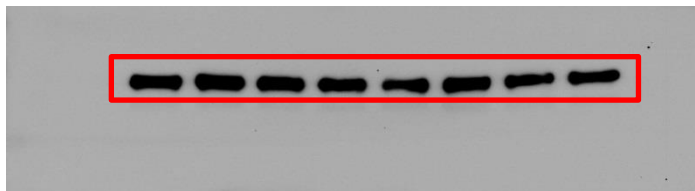

Supplement: EMBJ-38-e100947-s007.pdf [file EMBJ-38-e100947-s007.pdf]
